# Supplementary material for: The investigation of in situ removal of Si substrates for freestanding GaN crystals by HVPE
Source: Royal Society of Chemistry journal article supplement (doi:10.1039/c8ra01347k), 2018-01-01
Supplement: c8ra01347k1.pdf [file c8ra01347k1.pdf]

## Electronic supplementary information

# The investigation of in-situ removal of Si substrates for freestanding GaN crystals by HVPE

**Moonsang Lee<sup>a,\*</sup>, Dmitry Mikulik<sup>b,\*</sup>, and Sungsoo Park<sup>c, d, †</sup>**

<sup>a</sup>Korea Basic Science Institute, Daejeon, 169-148, Republic of Korea

<sup>b</sup>Ecole Polytechnique Fédérale de Lausanne, Laboratory of Semiconductor Materials, Lausanne, 1015, Switzerland

<sup>c</sup>Jeonju University, Department of Science Education, Jeonju, 303, Republic of Korea

<sup>d</sup>Jeonju University, Analytical Laboratory of Advanced Ferroelectric Crystals, Jeonju, 303, Republic of Korea

\*These authors equally contributed to this work.

Corresponding Author: †lms1015@kbsi.re.kr, sspark@jj.ac.kr

To confirm the crystal quality of freestanding GaN grown using in-situ removal of a Si substrate, etch pit density (EPD) measurement was employed. EPD was evaluated after etching the freestanding GaN crystal in  $\text{H}_3\text{PO}_4$  acid solution at 200 °C during 30 min. This revealed that threading dislocation densities were evaluated about  $1 \times 10^6/\text{cm}^2$ .

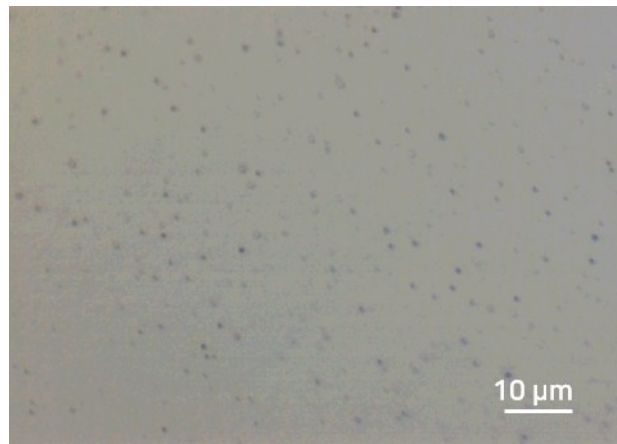

**Fig. S1** Microscopy image of the freestanding GaN crystal using in situ removal of a Si substrate.

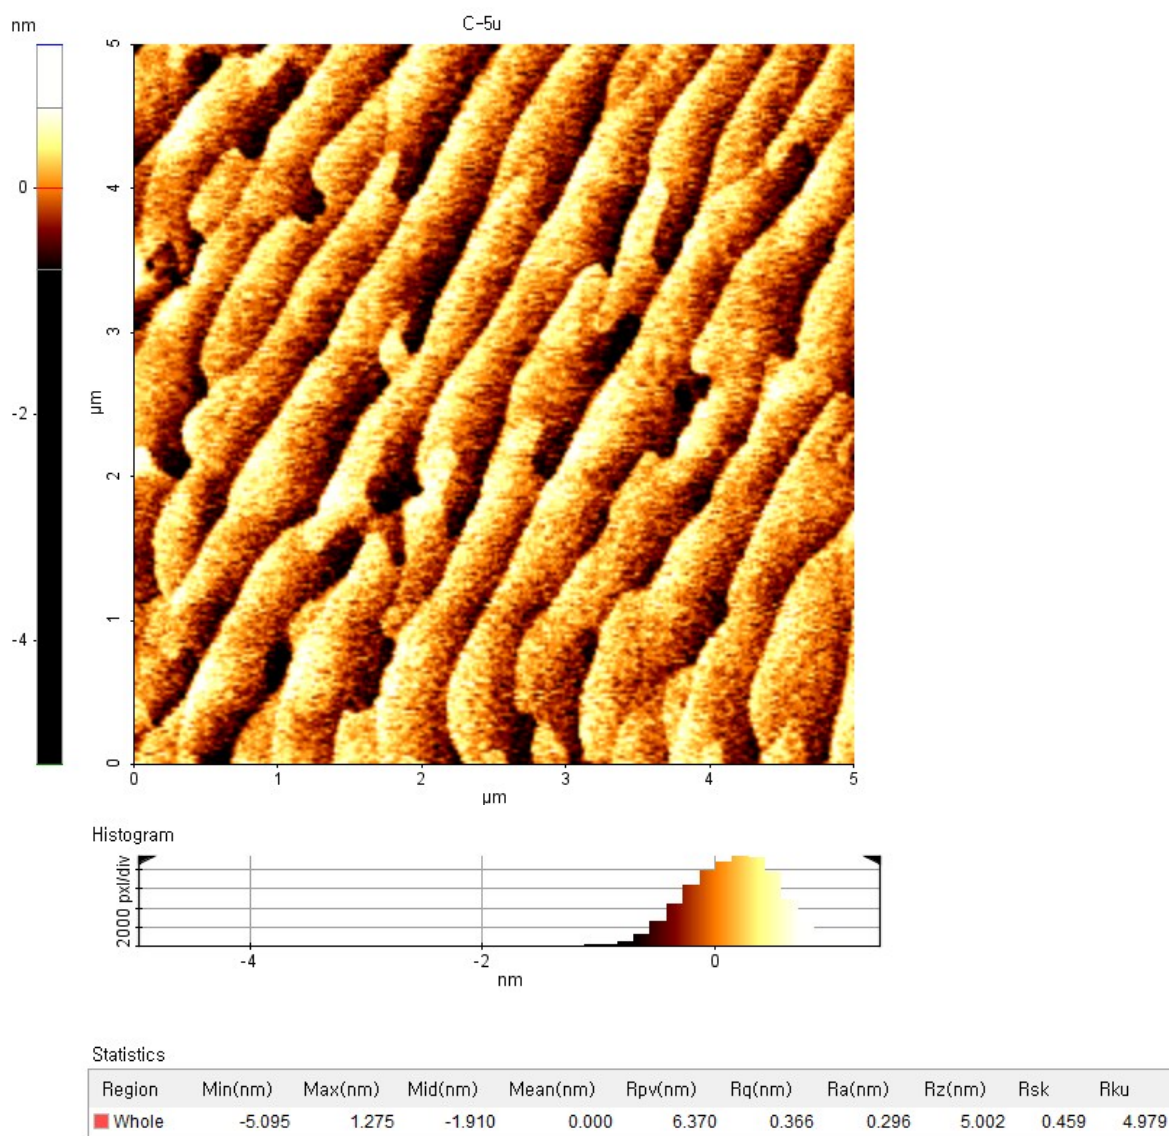

**Fig. S2** Atomic force microscopy image of surface morphology in a  $5\ \mu\text{m} \times 5\ \mu\text{m}$  area of freestanding GaN grown from a Si substrate using in situ removal method.
